# Supplementary material
Source: Elsevier journal article supplement (https://rcastoragev2.blob.core.windows.net/07bb72a8db940abb4f8f61b523b61dad/mmc1.pdf)
Supplement: mmc1 [file mmc1.pdf]

## Supplemental Information

### **A Dual Role of Caspase-8 in Triggering and Sensing Proliferation-Associated DNA Damage, a Key Determinant of Liver Cancer Development**

Yannick Boege, Mohsen Malehmir, Marc E. Healy, Kira Bettermann, Anna Lorentzen, Mihael Vucur, Akshay K. Ahuja, Friederike Böhm, Joachim C. Mertens, Yutaka Shimizu, Lukas Frick, Caroline Remouchamps, Karun Mutreja, Thilo Kähne, Devakumar Sundaravinayagam, Monika J. Wolf, Hubert Rehrauer, Christiane Koppe, Tobias Speicher, Susagna Padrisa-Altés, Renaud Maire, Jörn M. Schattenberg, Ju-Seong Jeong, Lei Liu, Stefan Zwirner, Regina Boger, Norbert Hüser, Roger J. Davis, Beat Müllhaupt, Holger Moch, Henning Schulze-Bergkamen, Pierre-Alain Clavien, Sabine Werner, Lubor Borsig, Sanjiv A. Luther, Philipp J. Jost, Ricardo Weinlich, Kristian Unger, Axel Behrens, Laura Hillert, Christopher Dillon, Michela Di Virgilio, David Wallach, Emmanuel Dejardin, Lars Zender, Michael Naumann, Henning Walczak, Douglas R. Green, Massimo Lopes, Inna Lavrik, Tom Luedde, Mathias Heikenwalder, and Achim Weber

**A** human chronic liver diseases

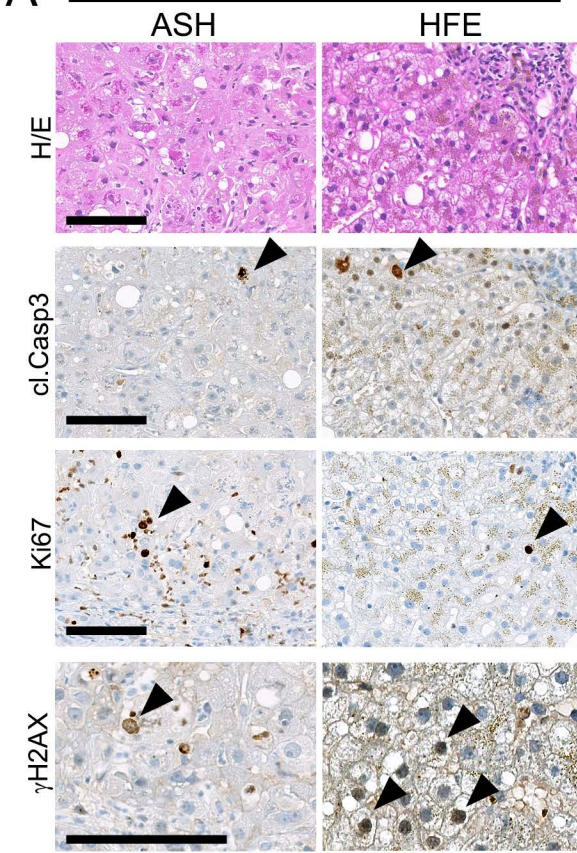

**B**

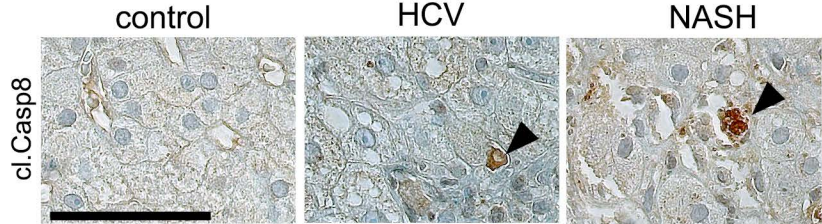

**C**

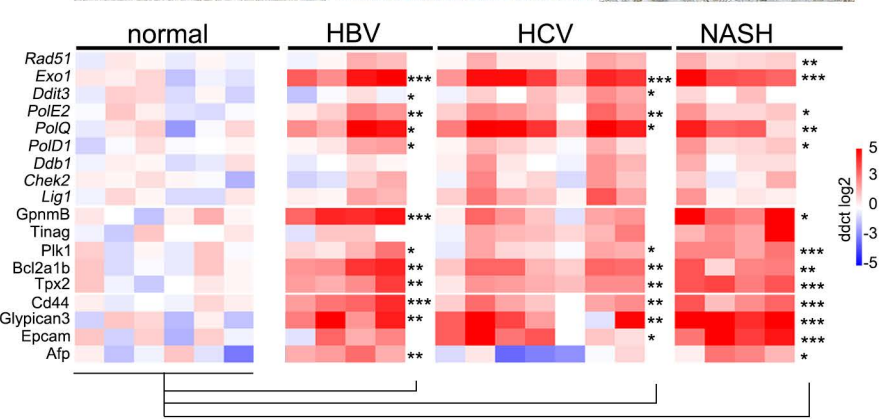

**D**

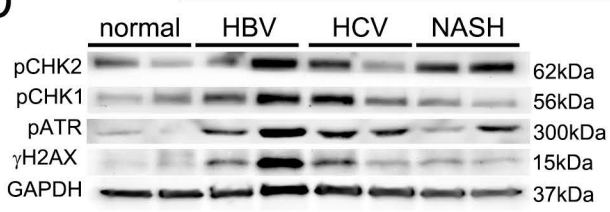

**E**

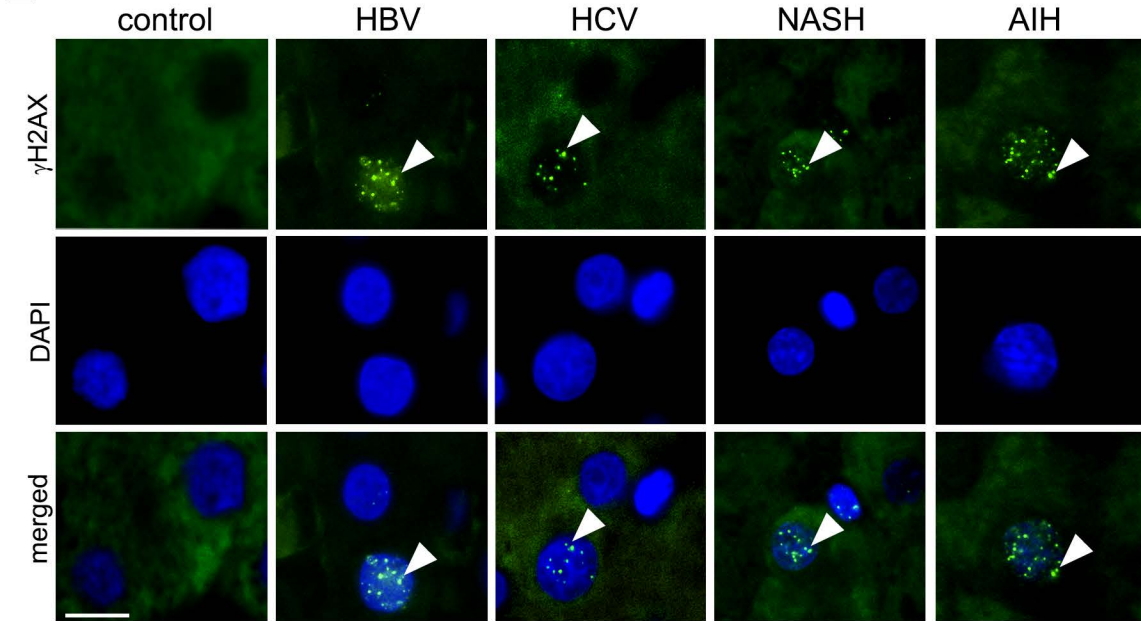

**F**

|        | $\gamma$ H2AX |          | Fisher's Exact Test |
|--------|---------------|----------|---------------------|
|        | positive      | negative |                     |
| normal | 3             | 14       |                     |
| HBV    | 14            | 1        | $p<0.001$           |
| HCV    | 25            | 2        | $p<0.001$           |
| NASH   | 18            | 2        | $p<0.001$           |
| AIH    | 7             | 1        | $p=0.02$            |

**G**

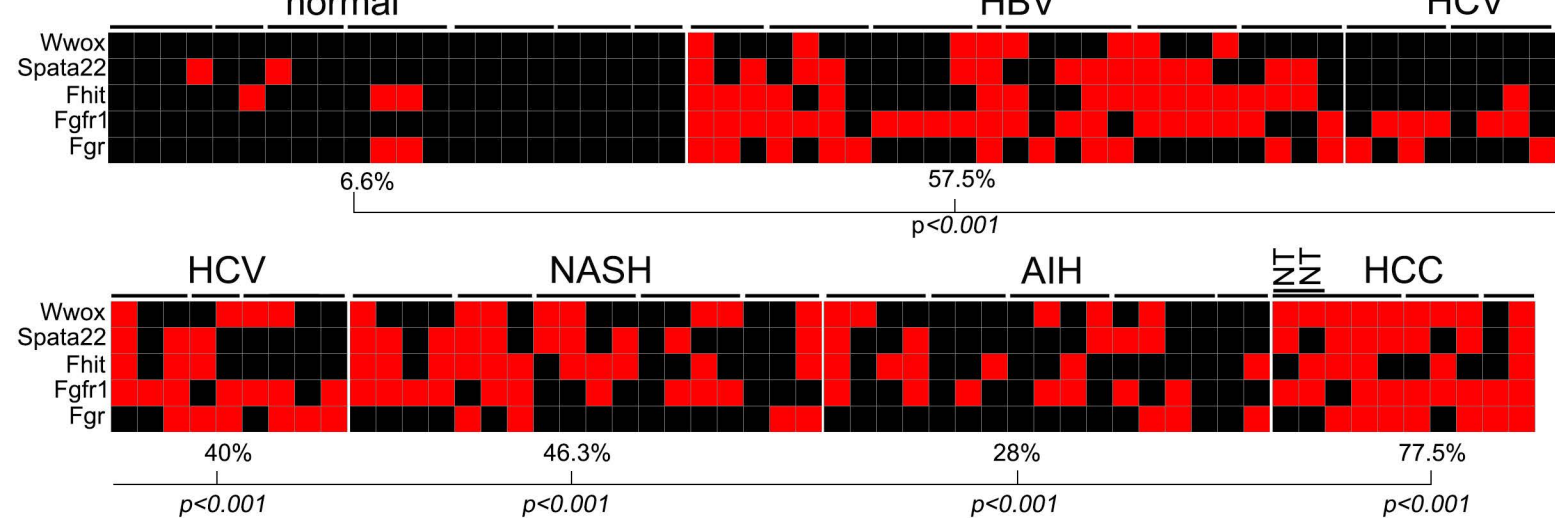

**H**

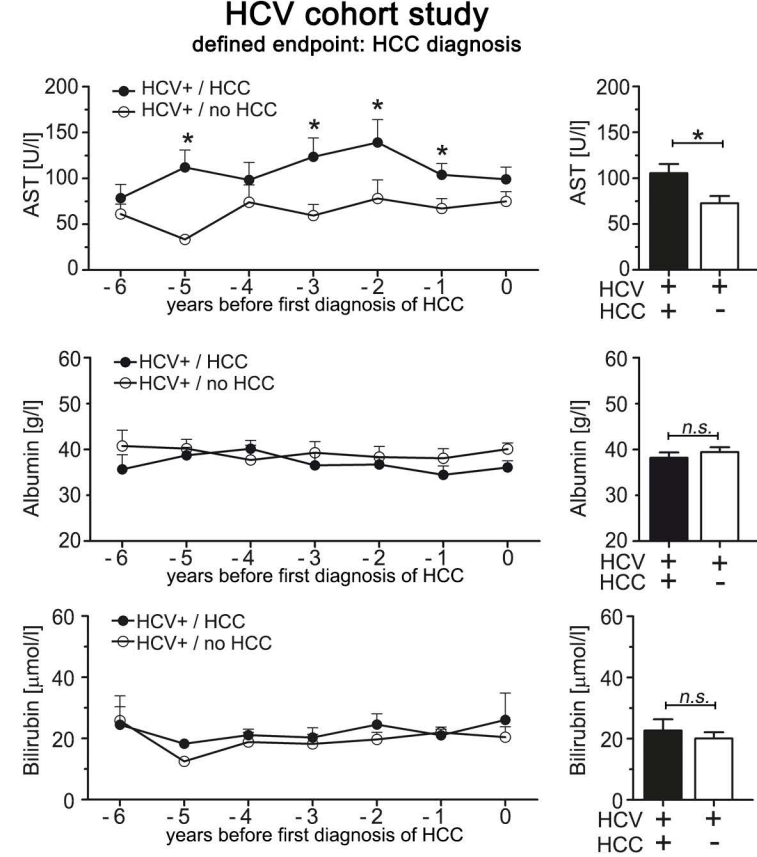

**I**

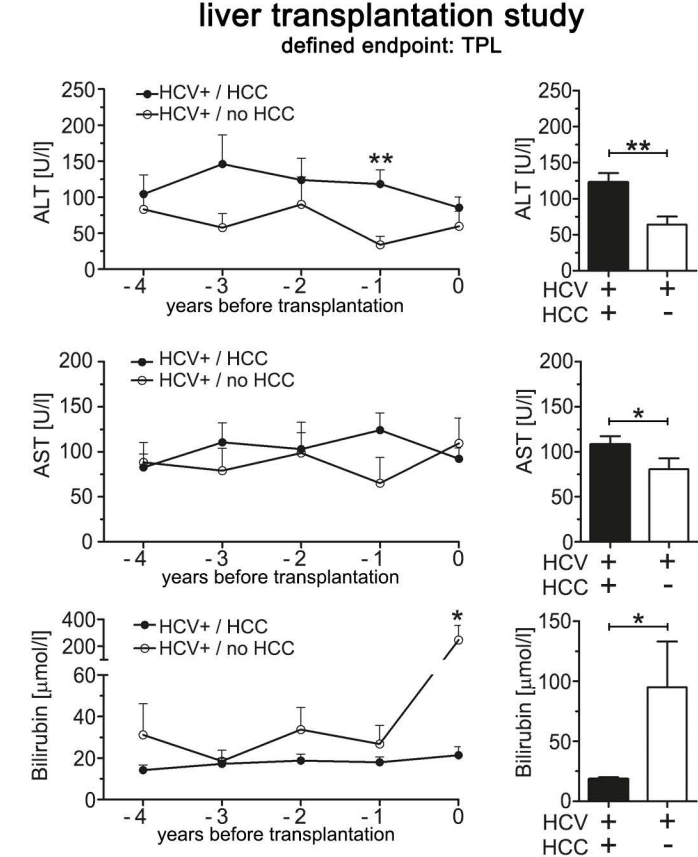

**Figure S1, related to Figure 1. DNA damage and genetic instability CLD preceding neoplastic lesions and HCC. (A)** Additional human CLD of different etiology including alcoholic steatohepatitis (ASH) and genetic hemochromatosis (HFE) reveal increased levels of apoptosis (cl.Casp3), proliferation (Ki67), and signs of DNA damage ( $\gamma$ H2AX). Scale bars: 100  $\mu$ m. **(B)** Immunohistochemical analysis of cleaved caspase 8 showing positive expression in the livers of HCV-infected patients and NASH patients. Scale bars: 100  $\mu$ m. **(C)** Increased expression levels of genes associated with DNA repair (e.g. *Rad51*, *Exo1*, *PolD1*) in CLD tissue and markers of malignancy (e.g. *CD44*, *Tpx2*, *Glypican3*). **(D)** Representative Western blot analyses of CLD tissues (liver biopsies) with increased levels of proteins associated with DNA repair. **(E)** Immunofluorescence staining showing the typical dotted nuclear staining pattern of  $\gamma$ H2AX (green) indicative of DNA damage response. DAPI (blue) indicates nuclear staining. Scale bar: 10  $\mu$ m. **(F)** Semi-quantitative immunohistochemical analysis of  $\gamma$ H2AX-positive cells in CLD compared to normal liver. **(G)** Additional CLD tissues showing increased rate of allelic imbalances (AI) reflecting genetic instability detected by TaqMan copy number assay. Each square represents one area of micro-dissected liver tissue and lines indicate different areas of the same liver (red: AI; black: no AI, NT= non-tumor CLD tissue). **(H)** Significantly higher AST, but not albumin or bilirubin levels in HCV patients with HCC development compared to matched HCV patients without HCC development of the same cohort. **(I)** Significantly higher ALT and AST, but lower bilirubin levels (due to less frequent terminal liver failure) in liver transplantation patients with HCC development compared to matched patients without HCC development of the same cohort. In (H) and (I), data are presented as mean  $\pm$  SEM. Statistical significance was calculated using Student's *t*-test (H,I). \**p* < 0.05; \*\**p* < 0.01.



**Figure S2, related to Figure 2. Risk of HCC development correlates with apoptosis and DNA damage in Mcl-1<sup>Δhep</sup> mice. (A)** Gene expression analysis by qPCR for *Mcl-1*, death receptor ligands (*Tnfa*, *Trail*) and death receptor (*Trailr*) of murine liver tissue at either 2 or 12 months of age. **(B)** Deregulated genes validated by qPCR in 2-months-old homozygous and hemizygous Mcl-1<sup>Δhep</sup> mice and controls (n=3 per group). In (A), data are presented as mean ± SEM. Statistical significance was calculated using Student's *t*-test. \**p* < 0.05; \*\**p* < 0.01; \*\*\**p* < 0.001.



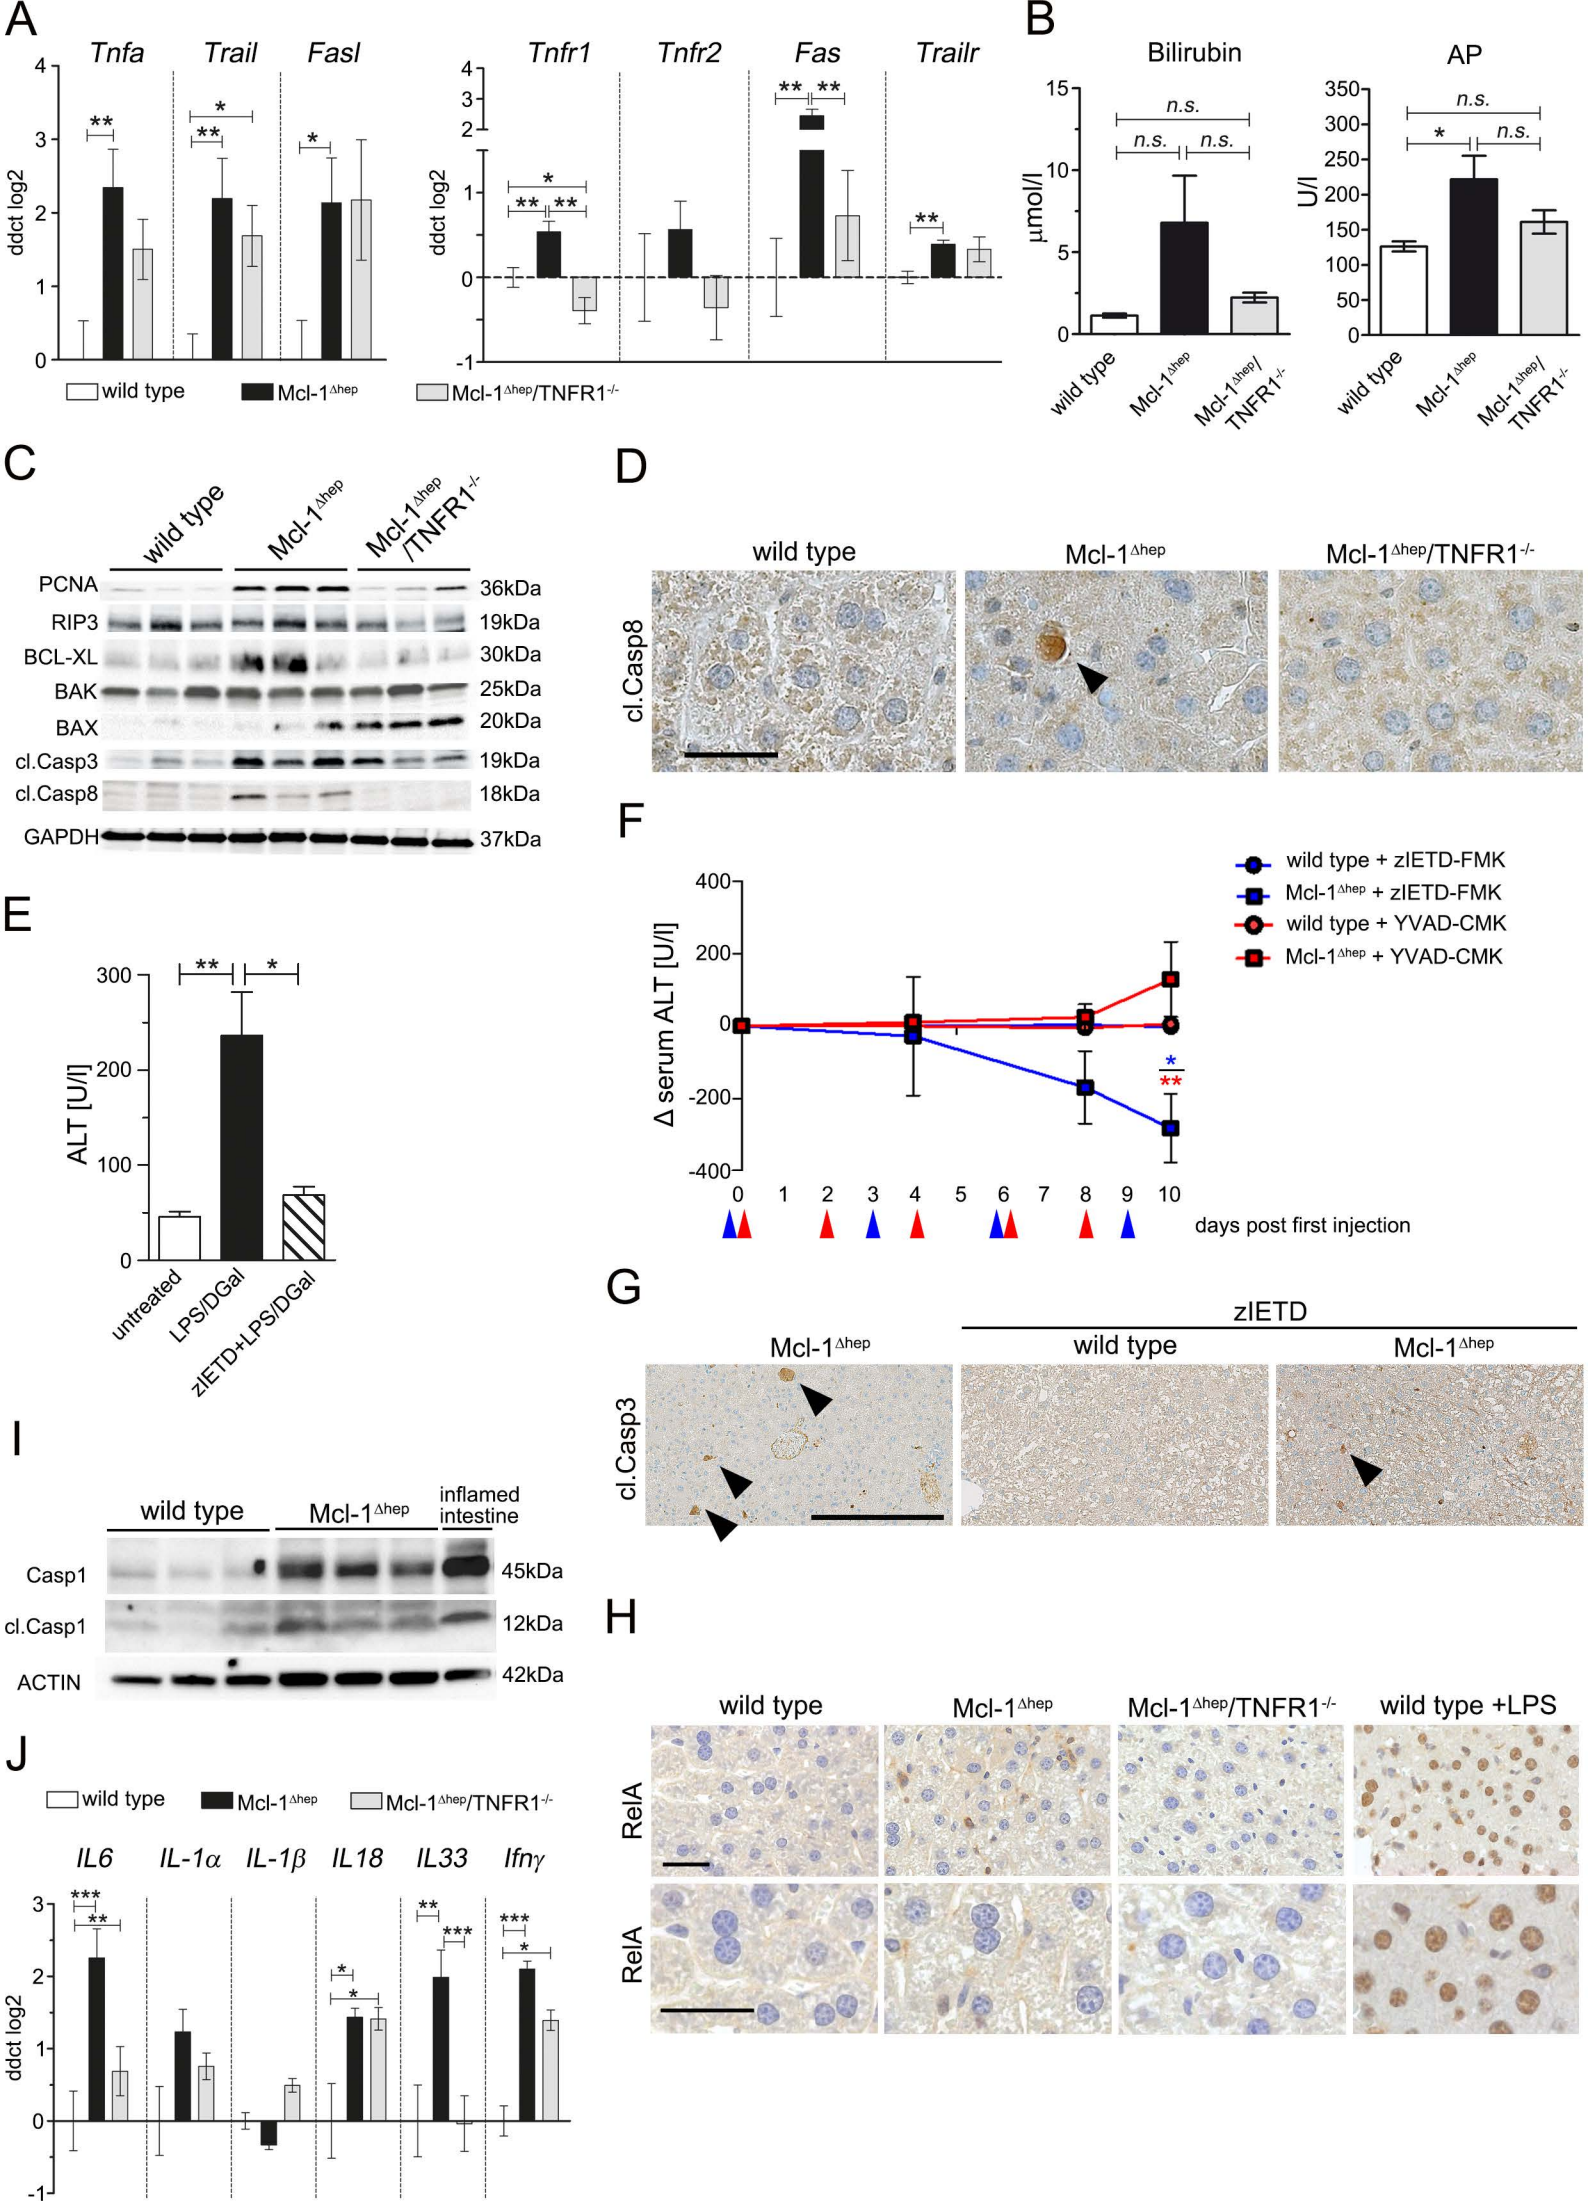

**Figure S3, related to Figure 3. Reduced apoptosis, proliferation, and tumor development in Mcl-1<sup>Δhep</sup>/TNFR1<sup>-/-</sup> mice.** (A) Significant changes in the expression of death receptors (*Tnfr1*, *Tnfr2*, *Fas*, *Trailr*) and ligands (*Tnfα*, *Trail*, *FasI*) comparing Mcl-1<sup>Δhep</sup> (n=7), Mcl-1<sup>Δhep</sup>/TNFR1<sup>-/-</sup> mice (n=5) and wild type mice (n=7). (B) Bilirubin and AP in 2-months-old Mcl-1<sup>Δhep</sup> (n=16), Mcl-1/TNFR1<sup>-/-</sup> (n=10) and wild type mice (n=8). (C) Western blot analysis of proliferation and apoptosis proteins in livers of Mcl-1<sup>Δhep</sup>/TNFR1<sup>-/-</sup> mice, compared to Mcl-1<sup>Δhep</sup> mice. (D) Immunohistochemistry for cleaved caspase 8 in livers of 2-months-old wild type control mice, Mcl-1<sup>Δhep</sup> mice and Mcl-1<sup>Δhep</sup>/TNFR1<sup>-/-</sup> mice. Scale bar: 50 μm. (E) ALT levels of wild type mice 4 h post LPS/DGal induction of hepatocyte apoptosis, with or without zIETD pre-treatment (n=3 mice per group). (F) 6-8 week old Mcl-1<sup>Δhep</sup> mice treated with the caspase 8-specific inhibitor zIETD (n=3 wild type and n=4 Mcl-1<sup>Δhep</sup> mice) showed a significant reduction in serum ALT levels. Treating age-matched Mcl-1<sup>Δhep</sup> mice with the caspase 1 inhibitor YVAD-CMK (n=3 wild type and n=5 Mcl-1<sup>Δhep</sup> mice) had no effect on serum levels of ALT. Injection time-points are marked with blue arrowheads for zIETD treated mice or red arrowheads for YVAD-CMK treated mice. (G) IHC for cleaved caspase 3 in zIETD treated wild type and Mcl-1<sup>Δhep</sup> mice as well as untreated Mcl-1<sup>Δhep</sup> mice. Scale bar: 250 μm. (H) Immunohistochemistry for RelA demonstrates no obvious RelA nuclear translocation in livers of Mcl-1<sup>Δhep</sup> and Mcl-1<sup>Δhep</sup>/TNFR1<sup>-/-</sup> mice. Scale bars: 50 μm. (I) Western blot analysis from whole liver protein extracts analysing cleaved caspase 1 expression in wild type or Mcl-1<sup>Δhep</sup> mice. (J) Cytokine expression analysis by qPCR from liver homogenates of 2-months-old Mcl-1<sup>Δhep</sup> mice, Mcl-1<sup>Δhep</sup>/TNFR1<sup>-/-</sup> mice and wild type control mice. Data presented as bar charts (A), (B), (E) and (J) represent mean values ± SEM. Data presented as line graph (F) represents mean values ± SEM. Statistical significance was calculated using ANOVA with Bonferroni correction (A) and (J), Student's *t*-test (B), (E) or Mann-Whitney U test (F). \**p* < 0.05; \*\**p* < 0.01; \*\*\**p* < 0.001.

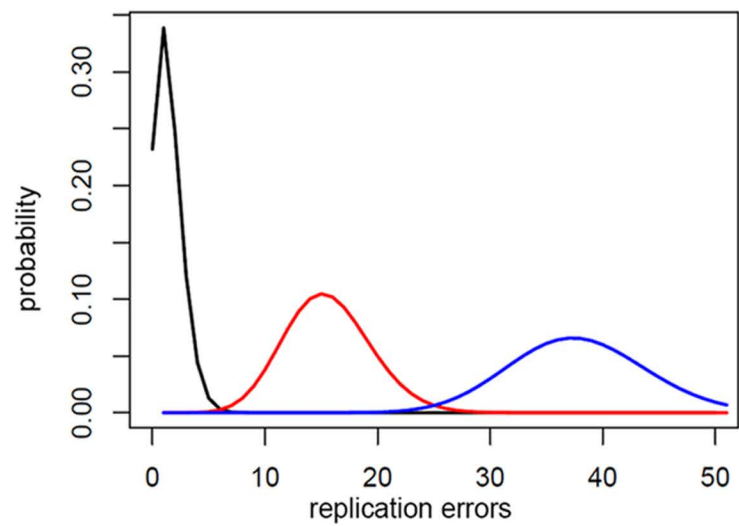



**Figure S4, related to Figure 3. Hepatocyte apoptosis and HCC development.** Replication errors in relation to the rate of hepatocyte proliferation. A rough calculation of replication error rates depending on the replicative activity in wild type mice (black) as well as Mcl-1<sup>Δhep</sup> mice with low transaminase levels and corresponding low proliferative activity (red) or Mcl-1<sup>Δhep</sup> mice with high transaminase levels and corresponding high proliferative activity (blue). The expected number of replications errors after 1 year of is 1.46 for wild type mice (black line), 14.6 for Mcl-1<sup>Δhep</sup> mice with low hepatocyte proliferative activity, and 36.8 for Mcl-1<sup>Δhep</sup> mice with high hepatocyte proliferative activity (blue line).

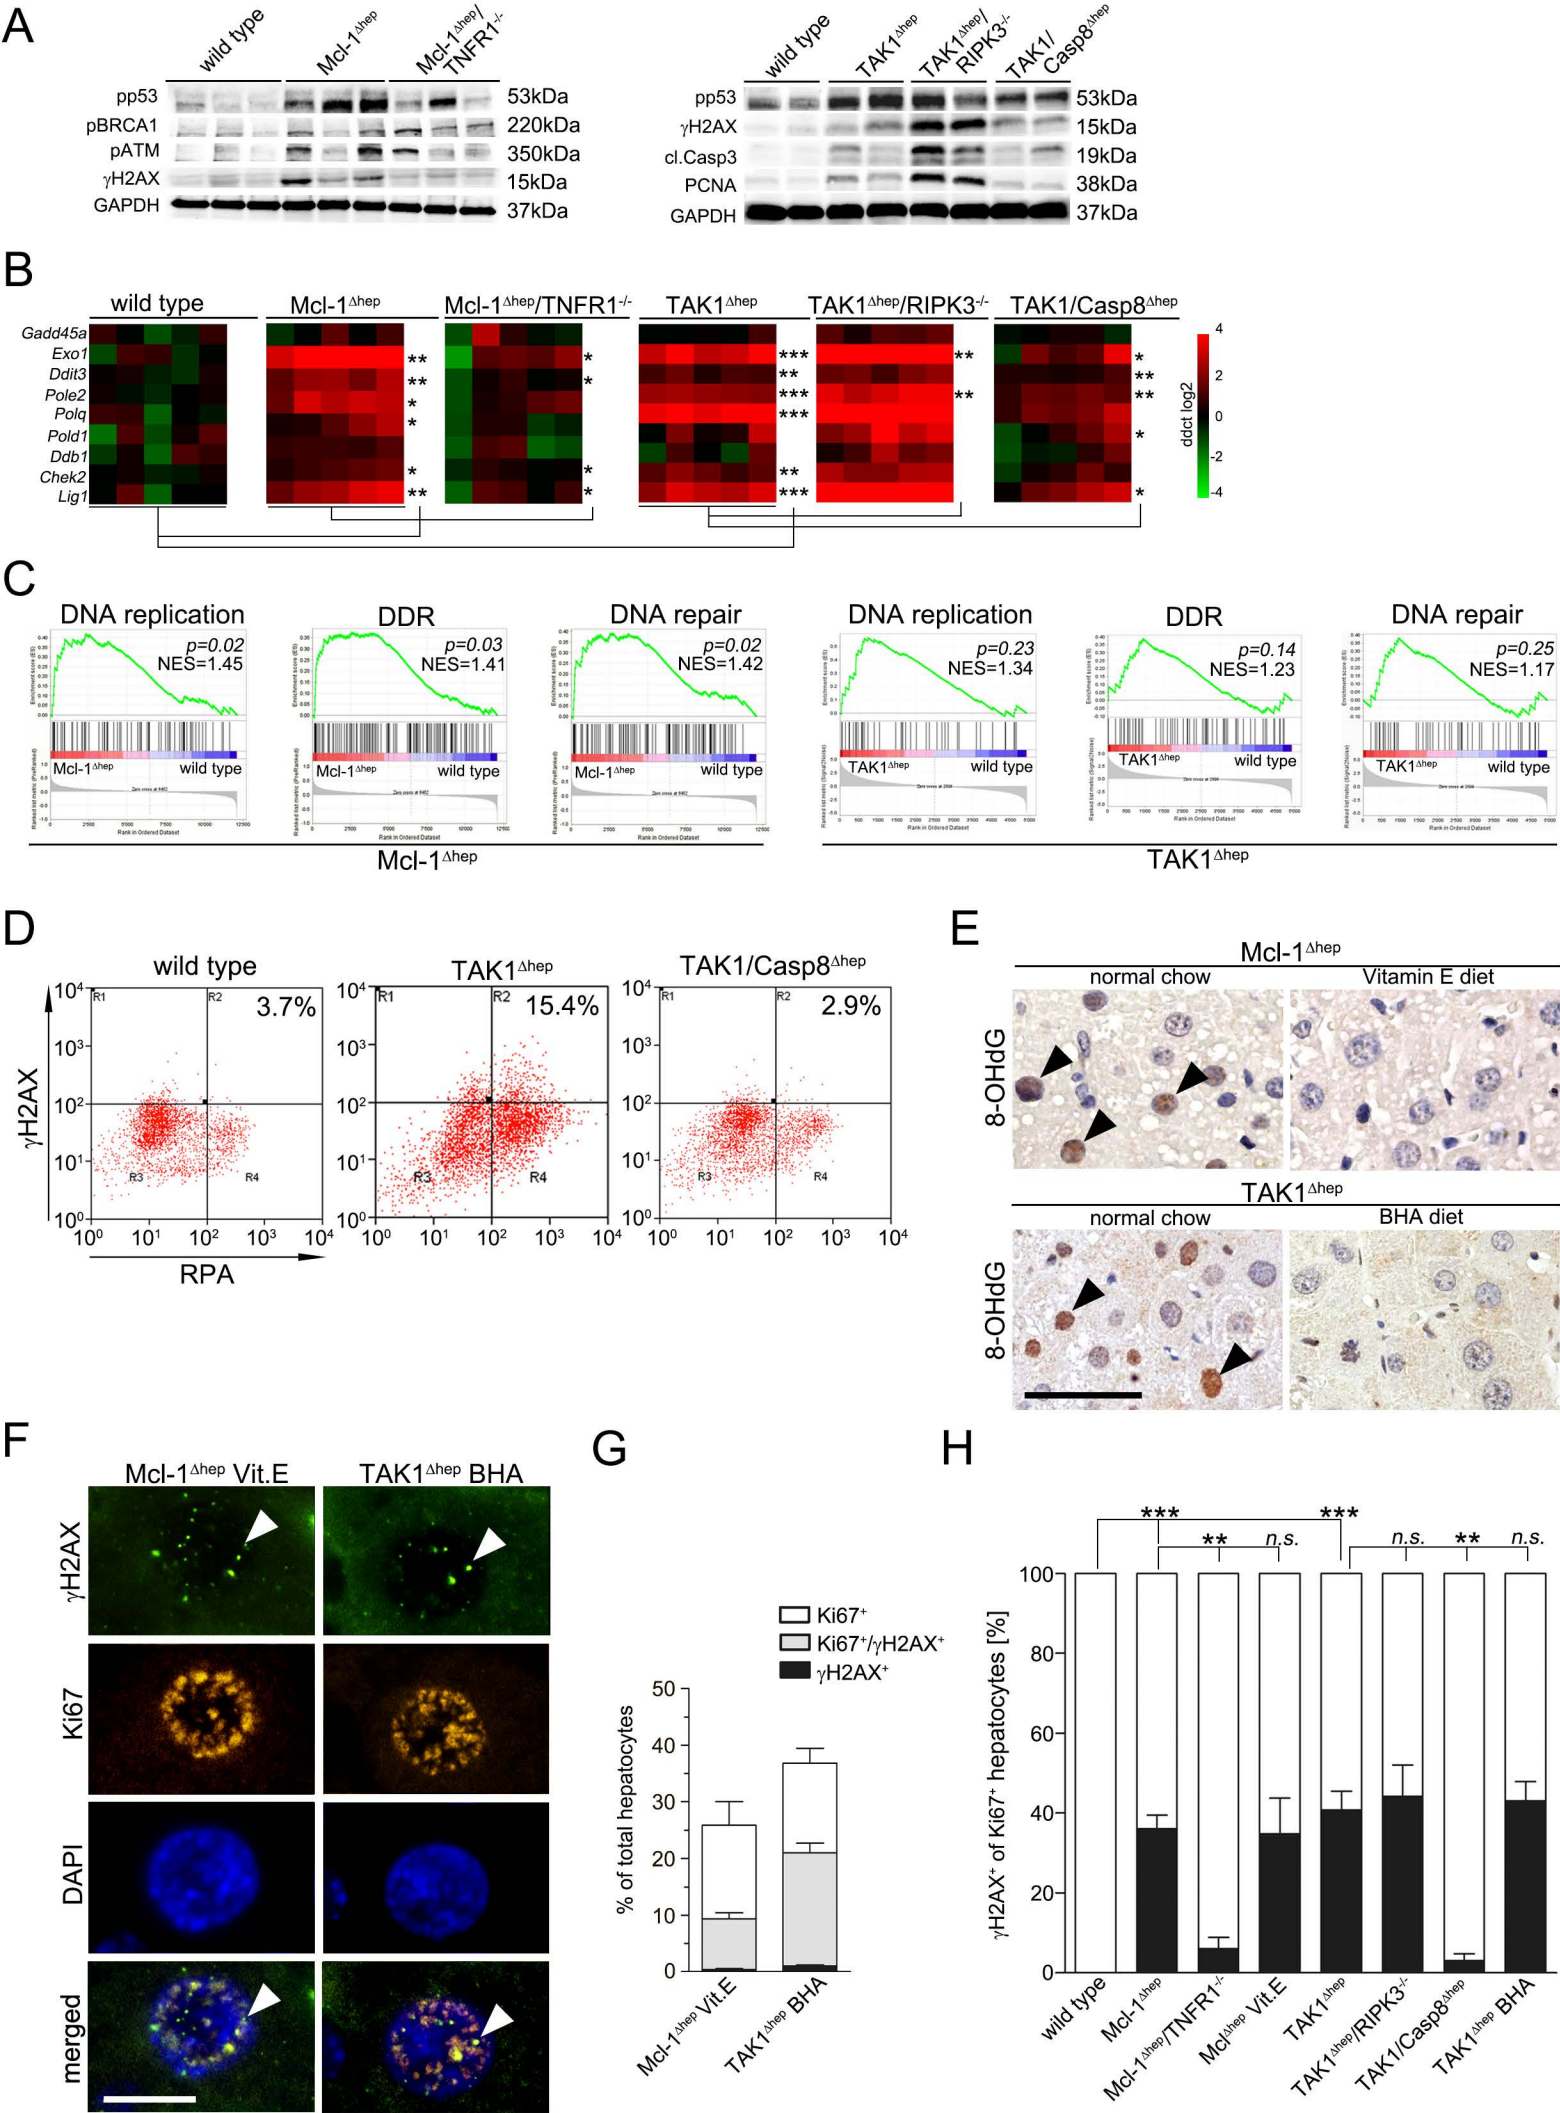

**Figure S5, related to Figure 4. DNA damage and genetic instability in Mcl-1<sup>Δhep</sup> and TAK1<sup>Δhep</sup> mice and intercrossings. (A)** Western blot analysis shows reduced activation of DNA damage and DNA repair protein levels in liver homogenates from Mcl-1<sup>Δhep</sup>/TNFR1<sup>-/-</sup> mice when compared to TAK1<sup>Δhep</sup> mice. **(B)** Heat map analysis illustrates reduced expression of DNA damage and DNA repair-associated genes (qPCR) in livers of Mcl-1<sup>Δhep</sup>/TNFR1<sup>-/-</sup> mice when compared to Mcl-1<sup>Δhep</sup> mice. A similar effect was observed in livers of TAK1/Casp8<sup>Δhep</sup> mice compared to TAK1<sup>Δhep</sup> controls. **(C)** GSEA reveals statistically significant enrichment of genes associated with DNA replication, DNA damage response and DNA repair in Mcl-1<sup>Δhep</sup> and TAK1<sup>Δhep</sup> mice, respectively. (NES= normalized enrichment score). **(D)** Intracellular hepatocyte FACS analysis for γH2AX and RPA showing reduced DNA damage in TAK1/Casp8<sup>Δhep</sup> mice compared to TAK1<sup>Δhep</sup>. (2-4 mice per genotype; average percentage of γH2AX<sup>+</sup>/RPA<sup>+</sup> cells indicated). **(E)** Livers of Mcl-1<sup>Δhep</sup> and TAK1<sup>Δhep</sup> mice on normal chow but not on antioxidant diets show 8-OHdG positive hepatocytes, indicating oxidative stress. Scale bar: 50 μm. **(F)** and **(G)** Livers of mice on antioxidant diet: Mcl-1<sup>Δhep</sup> mice on a Vitamin E supplemented and TAK1<sup>Δhep</sup> mice on a BHA supplemented diet do not have reduced number of hepatocytes positive for γH2AX and Ki67. Scale bar (F): 10 μm. **(H)** Summary of γH2AX positivity of hepatocytes as percentage of proliferating (Ki67-positive) hepatocytes for all genotypes and experiments. **(A)-(F):** Mcl-1<sup>Δhep</sup> mice and intercrossings analyzed at 2 months; TAK1<sup>Δhep</sup> mice and intercrossings analyzed at 6 weeks. Data presented as bar charts (G) and (H) represent mean values ± SEM. Statistical significance was determined using ANOVA with Bonferroni correction (H). \*\**p* < 0.01; \*\*\**p* < 0.001.

A

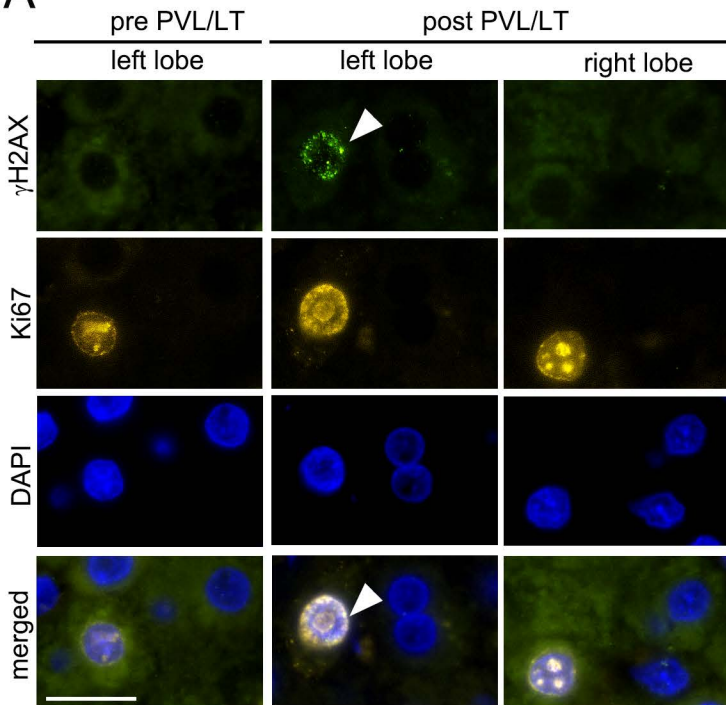

B

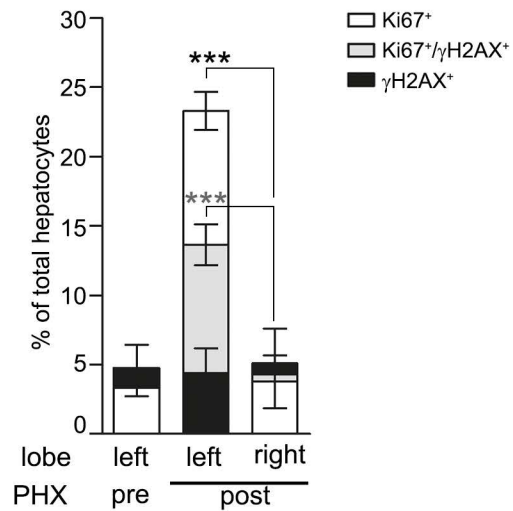

**Figure S6, related to Figure 5. Hyperproliferation-induced DNA damage after partial hepatectomy (PHX) is impaired in right portal vein ligation and liver transection (PVL/LT) patients. (A)** IF staining and **(B)** quantification for Ki67 and  $\gamma$ H2AX of hepatocytes in liver biopsies of patients prior to and after PVL/LT demonstrating a significant increase in  $\gamma$ H2AX/Ki67-double positive hepatocytes in the regenerating liver on the left side compared to right. (Scale bar (A): 20  $\mu$ m). Data presented as bar charts (B) represents mean values  $\pm$  SEM. Statistical significance was calculated using ANOVA with Bonferroni correction. \*\* $p < 0.01$ ; \*\*\* $p < 0.001$ .



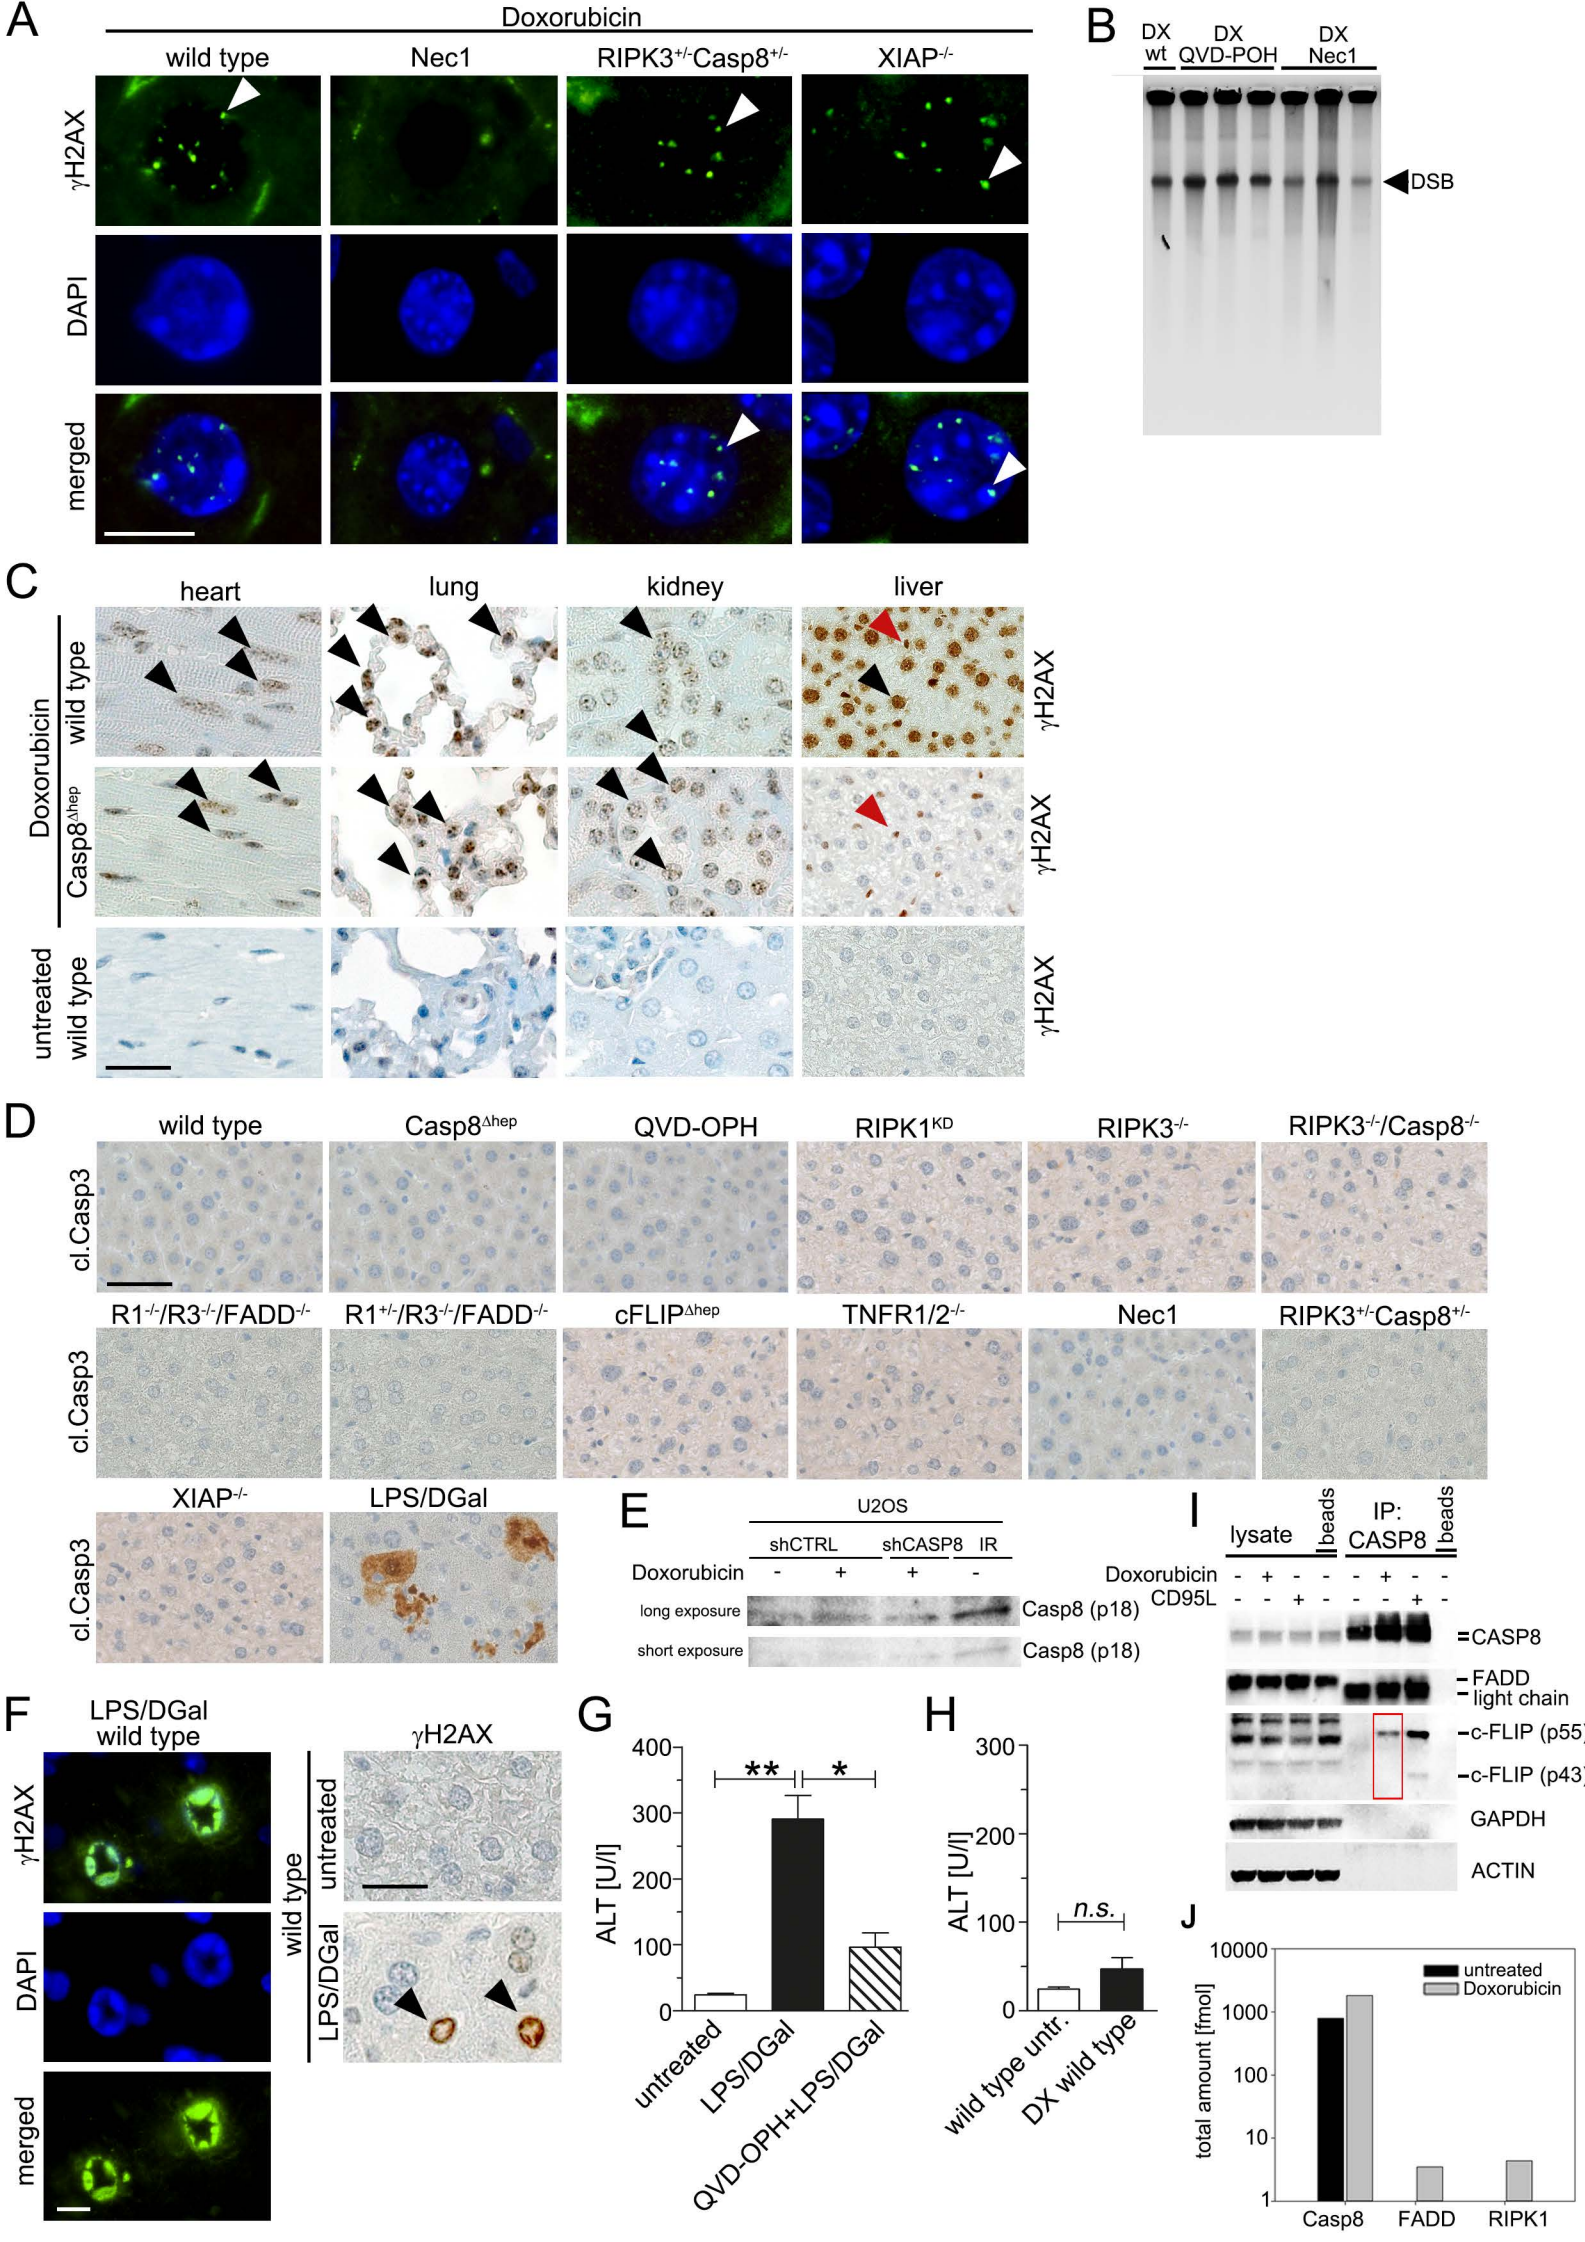

**Figure S7, related to Figure 6. Casp8, RIPK1, FADD and c-FLIP are crucial for DDR in hepatocytes upon doxorubicin treatment. (A)**  $\gamma$ H2AX staining of doxorubicin-treated wild type mice or Nec1-treated wild type mice (n=6), RIPK1<sup>+/-</sup>Casp<sup>+/-</sup> (n=7) and XIAP<sup>-/-</sup> mice (n=7). Scale bar: 10  $\mu$ m. **(B)** DNA strand breaks visualized by PFGE in Nec1 and QVD-OPH pre-treated wild type mice 12 h after doxorubicin challenge. **(C)**  $\gamma$ H2AX positivity 12h post doxorubicin injection in heart, lung, kidney and liver in wild type control or Casp8 <sup>$\Delta$ hep</sup> mice. Scale bars: 50  $\mu$ m. **(D)** IHC for cleaved caspase 3 in wild type mice as well as different knock-out mice upon doxorubicin treatment. As positive control LPS/DGal treated wild type mice were analyzed. Scale bar: 50  $\mu$ m. **(E)** Western blot analysis for cleaved caspase 8 30 minutes post doxorubicin treatment (1 $\mu$ M). **(F)** Hepatocytes displaying nuclear fragmentation and condensation indicative of apoptosis in livers of LPS/DGal-treated wild type mice shown as controls by immunofluorescence and IHC. Scale bars: 10  $\mu$ m (left) and 50  $\mu$ m (right). **(G)** Aminotransferase levels of wild type control mice 4 h post LPS/DGal induction of hepatocyte apoptosis, with or without QVD-OPH pre-treatment (n=3 mice per group). **(H)** Aminotransferase levels reveal no hepatotoxicity upon DX treatment as measured by serum levels of ALT. **(I)** Immunoprecipitation with anti-caspase 8 antibody and immunoblotting of lysates 1h after doxorubicin (5  $\mu$ M) treatment. Red box indicates caspase 8 and c-Flip interaction following doxorubicin treatment. **(J)** Mass Spec analysis of the precipitates with caspase 8 antibodies. Data presented as bar charts (G) and (H) represent mean values  $\pm$  SEM. Statistical significance was calculated using Student's *t*-test (G) and (H). \**p* < 0.05; \*\**p* < 0.01.



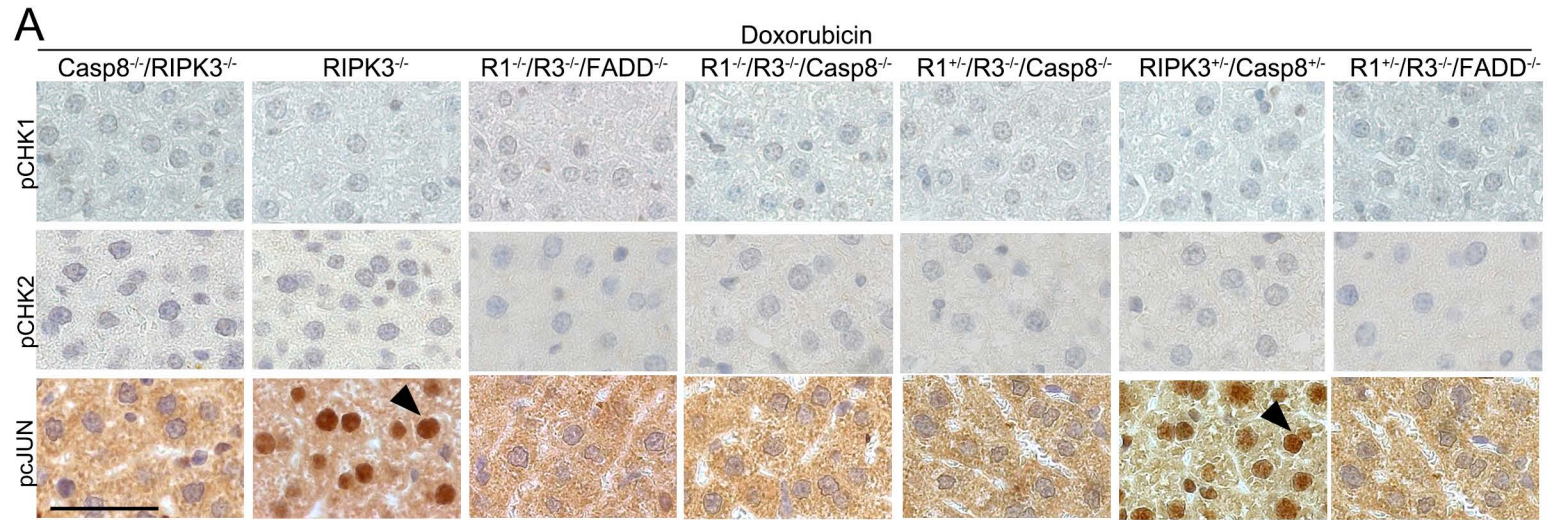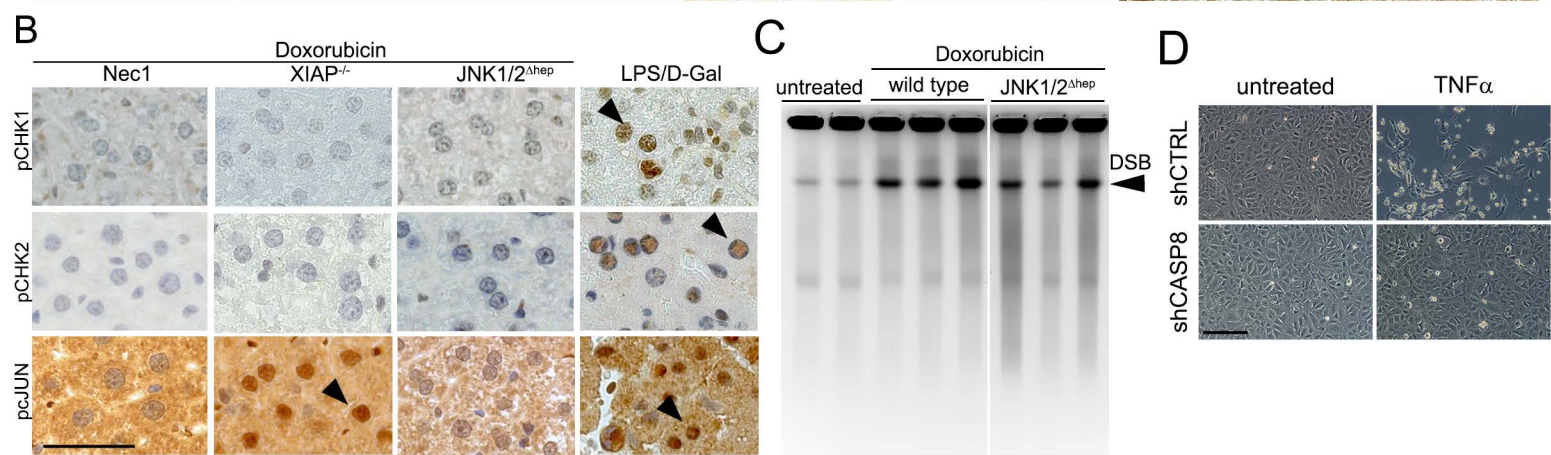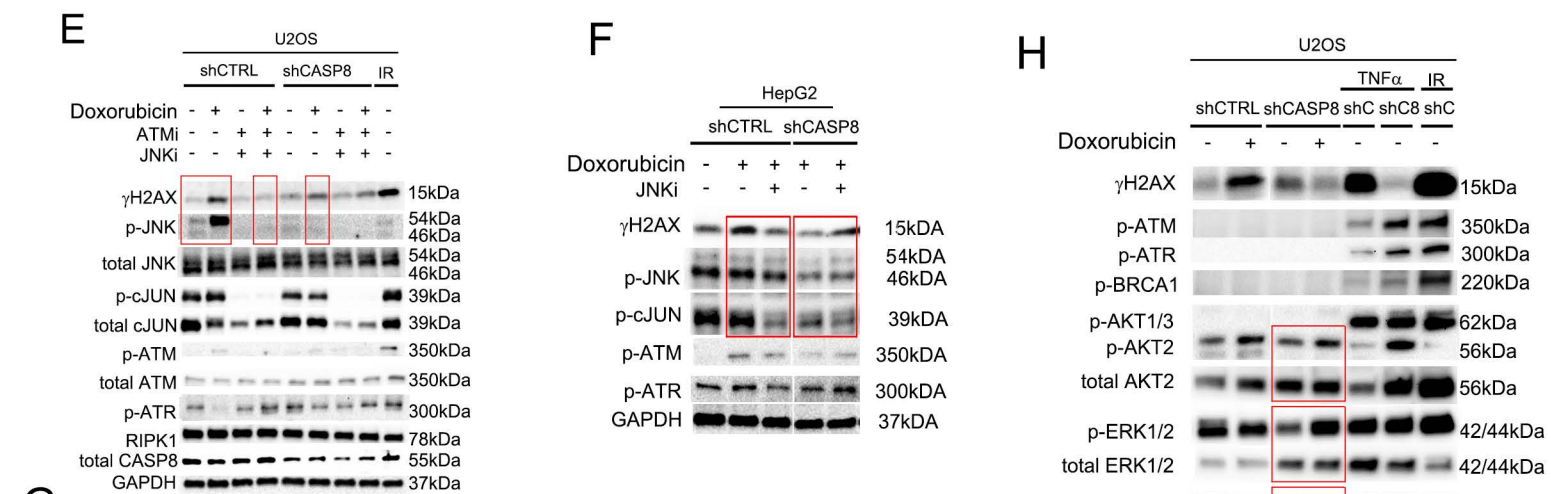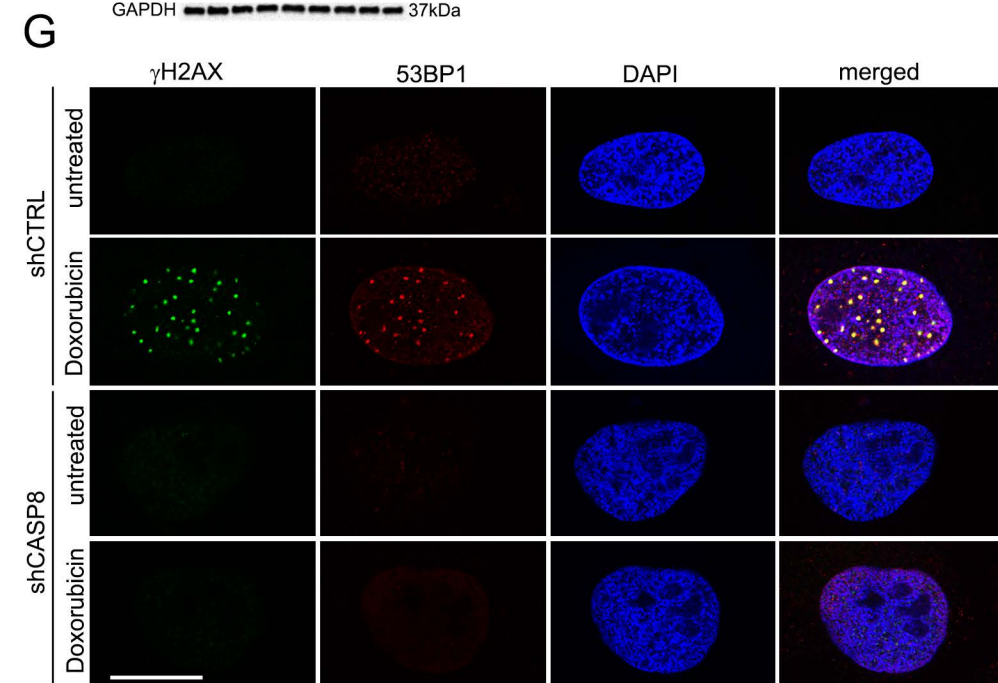

**Figure S8, related to Figure 7. JNK is a downstream mediator of caspase 8, c-FLIP and RIPK1-dependent DNA damage response *in vivo* and *in vitro*.** (A) and (B) Immuno staining for pCHK1, pCHK2 and pcJun in several knock-out mice, respectively. Wild type control mice treated with LPS/DGal (B) for the induction of hepatocyte cell death were used as positive controls. Black arrow heads: pcJUN-positive hepatocytes. Scale bars (A) and (B): 50  $\mu$ m. (C) DNA double strand breaks visualized by PFGE in hepatocytes from untreated wild type control mice, as well as wild type control mice and JNK1/2<sup>Δhep</sup> mice following 12 hours doxorubicin treatment. (D) Increased cell death in shCTRL cells (U2OS) which was absent or strongly reduced in shCASP8 cells (visualized by apoptotic morphology, phase contrast microscopy) in response to TNF $\alpha$  treatment (10ng/ml) at 48h. Scale bar: 500  $\mu$ m. (E) Analysis of DDR signaling by Western blotting of doxorubicin treated shCTRL or shCASP8 U2OS cells pre-treated with JNK inhibitor (SP600125) and ATM inhibitor (Ku-55933), or untreated as control. Cells were pretreated with both inhibitors for 4h and analyzed by Western blotting 30min post doxorubicin administration (1 $\mu$ M). As control, cells 2h post irradiation (10Gy) were used. GAPDH was probed as a loading control. Red boxes illustrate differences in  $\gamma$ H2AX and pJNK activation post doxorubicin treatment. (F) Doxorubicin treatment of HepG2 revealed substance- and cell line-independent, but caspase 8-dependent JNK activity and cJUN and  $\gamma$ H2AX phosphorylation upon induction of DSB. Western blotting was performed 30 min post DSB induction. Red boxes illustrate differences in  $\gamma$ H2AX, pJNK or pcJUN post doxorubicin treatment. (G) IF staining and confocal imaging for 53BP1 and  $\gamma$ H2AX of U2OS cells 30 min post doxorubicin administration (1 $\mu$ M) revealing lack of 53BP1-positive foci formation in shCASP8 cells in contrast to doxorubicin-treated shCTRL cells. DAPI (blue) staining indicates nuclear staining. Scale bar: 10  $\mu$ m. (H) Western blot analyses for MAPK and PI3K signaling pathways revealed lower p-p38 and p-ERK1/2 baseline activation in untreated and higher total amounts of ERK1/2, p38 and AKT2 as well as impaired p38 activation in doxorubicin-treated shCASP8 cells, compared to doxorubicin-treated shCTRL cells. Red boxes illustrate differences between shCTRL and shCASP8 cells in p-AKT2, AKT2, p-ERK1/2, ERK1/2, p-p38 or p38. Irrelevant lanes omitted from PFGE analysis displayed in (C) and western blot analysis

displayed in (F) and (H). Areas where lanes were omitted are indicated by white space between lanes.



|                                             | Liver regeneration at 8 weeks |               |     |     | HCC incidence |
|---------------------------------------------|-------------------------------|---------------|-----|-----|---------------|
|                                             | apoptosis                     | proliferation | DDR | AI  |               |
| wild type                                   | -                             | -             | -   | -   | 0%            |
| Mcl-1 <sup>Δhep</sup>                       | +                             | +             | +   | +   | 50%           |
| Mcl-1 <sup>Δhep</sup> /TNFR1 <sup>-/-</sup> | +/-                           | +/-           | +/- | +/- | 28.2%         |
|                                             | Liver regeneration at 6 weeks |               |     |     | HCC incidence |
|                                             | apoptosis                     | proliferation | DDR | AI  |               |
| TAK1 <sup>Δhep</sup>                        | ++                            | ++            | ++  | ++  | 100%          |
| TAK1 <sup>Δhep</sup> /RIPK3 <sup>-/-</sup>  | ++                            | ++            | ++  | ++  | 100%          |
| TAK1/Casp8 <sup>Δhep</sup>                  | -                             | +/-           | -   | +/- | 0%            |

**Table S1, related to Methods. Mouse strains and intercrossings.** Liver damage of mice at the indicated age and tumor incidence analyzed at 12 months of age for Mcl-1<sup>Δhep</sup> and Mcl-1<sup>Δhep</sup>/TNFR1<sup>-/-</sup> mice and 33-35 weeks of age for TAK1<sup>Δhep</sup> mice and intercrossings. AI = allelic imbalances at chromosomal fragile sites. DDR = DNA damage response. “++” indicates significantly increased levels of hepatocytes positive for cl.Casp3, Ki67 or γH2AX, “+/-” indicates slightly elevated levels and “-” indicates level comparable to wild type controls.
